# Supplementary material
Source: bioRxiv or medRxiv preprint supplement (https://www.biorxiv.org/highwire/filestream/86123/field_highwire_adjunct_files/1/098178-10.pdf)

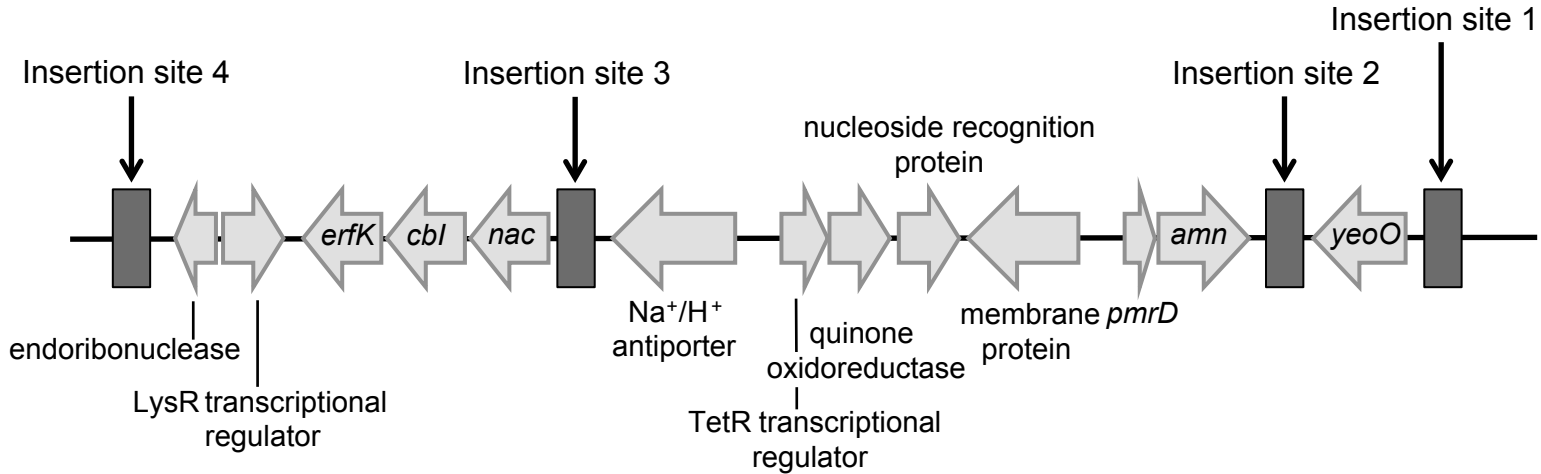

Supplement: Supplementary file [file 098178-10.pdf]
